# Supplementary material for: Association between race/ethnicity and the risk of amputation of lower extremities among medicare beneficiaries with diabetic foot ulcers and diabetic foot infections
Source: PubMed Central journal article supplement — BMJ Open Diabetes Res Care. 2020 Aug 24;8(1):e001328. doi: 10.1136/bmjdrc-2020-001328 (PMC7449291; doi:10.1136/bmjdrc-2020-001328), 2020-08-24
Supplement: bmjdrc-2020-001328supp001.pdf [file bmjdrc-2020-001328supp001.pdf]

eTable 1. International Classification of Diseases, Ninth Revision, Clinical Modification (ICD-9-CM) Codes

|                                                                       | ICD-9-CM Codes                                      |
|-----------------------------------------------------------------------|-----------------------------------------------------|
| <b>A. Diabetes</b>                                                    | 250.xx                                              |
|                                                                       |                                                     |
| <b>B. Foot Ulcer</b>                                                  |                                                     |
| Ulcer of lower limbs                                                  | 707.1x                                              |
| Chronic ulcer of other specified sites                                | 707.8                                               |
| Chronic ulcer of unspecified sites                                    | 707.9                                               |
| Atherosclerosis of native arteries of the extremities with ulceration | 440.23                                              |
|                                                                       |                                                     |
| <b>C. Foot Infection</b>                                              |                                                     |
| Cellulitis and abscess of toe or foot                                 | 681.1, 682.7                                        |
| Cellulitis and abscess of unspecified digits                          | 681.9                                               |
| Gas gangrene                                                          | 040.0                                               |
| Osteomyelitis                                                         | 730.06-730.09, 730.16-730.19, 730.26-730.29, 730.97 |
|                                                                       |                                                     |
| <b>C. Peripheral Artery Disease</b>                                   | 250.70, 250.71, 440.23, 443.0, 459.81               |
|                                                                       |                                                     |

ICD-9-CM, *International Classification of Diseases, Ninth Revision, Clinical Modification (ICD-9-CM)*
